# Supplementary material for: Plasminogen Deficiency Significantly Reduces Vascular Wall Disease in a Murine Model of Type IIa Hypercholesterolemia
Source: MDPI journal article supplement (doi:10.3390/biomedicines9121832), 2021-12-04
Supplement: s1 [file s1]

**Table S1. Primers and probes for genotyping of interbred mice with combined deficiencies of LDLR, Apobec, and Pg**

| Gene    | Primer identification <sup>a</sup>   | Sequence of oligonucleotide                      |
|---------|--------------------------------------|--------------------------------------------------|
| Ldlr    | WT-Ldlr-F                            | 5'- CAAGACGTGCTCCCAGGATGACTTC                    |
|         | WT/N-Ldlr-R (common) <sup>a</sup>    | 5'-CTTGTCTTGCAGTCTGCCTCGCC                       |
|         | WT-Ldlr-FITC <sup>b</sup>            | 5'-CAATCTCGGTCTCCATCACACAC-FITC                  |
|         | WT-Ldlr-R640 <sup>c</sup>            | 5'-R640-ACTGCGGGGAGATGCACTTGCCATC-P              |
|         | Null-Ldlr-NEO                        | 5'-GATTGGGAAGACAATAGCAGGCATGC                    |
|         | Null-Ldlr FITC <sup>b</sup>          | 5'-GCTGGTTCTTTCCGCCTCAGAA-FITC                   |
|         | Null-Ldlr-R705 <sup>c</sup>          | 5'-R705-CATAGAGCCCACCGCATCCCCA-P                 |
| Apobec1 | WT-Apobec1-F                         | 5'-GCCACTATGCCCAGGTCA                            |
|         | WT/N-Apobec1-R (common) <sup>a</sup> | 5'-CTCCAATACATACAGTTTCACCCAC                     |
|         | WT-Apobec1-FITC <sup>b</sup>         | 5'-TTAGAGTATTGTTACTGCTGGAGGAA-FITC               |
|         | WT-Apobec1-R640 <sup>c</sup>         | 5'-R640-TCGTCAACTACCCCCCTCTTCAAACG-P             |
|         | Null-Apobec1-NEO                     | 5'-ACAAGCAAAACCAAATTAAGGGCCA                     |
|         | Null-Apobec1-FITC <sup>b</sup>       | 5'-TGCTGATCTCGTTCTTCAGGCTAT-FITC                 |
|         | Null-Apobec1-R705 <sup>c</sup>       | 5'-R705-AACTGACACATTTGGAAACCACAG-TACTTAGAACCAC-P |
| Pg      | WT-Pg-F                              | 5'-TCAGCAGGGCAATGTCACGG                          |
|         | WT-Pg-R                              | 5'-CTCTCTGTCTGCCTTCCATGG                         |
|         | WT-Pg-FITC <sup>b</sup>              | 5'-TCACACGGTCACCCAACACA-FITC                     |
|         | WT-Pg-R640 <sup>c</sup>              | 5'-R640-AGCATCAAAACAGGTGCGGCA-P                  |
|         | Null-Pg-F                            | 5'-GACATGGATGGCTGAACCGTCTCTGT                    |
|         | Null-Pg-R                            | 5'-ACAAGCAAAACCAAATTAAGGGCCA                     |
|         | Null-Pg-TAMURA/BHQ <sup>d</sup>      | 5'-TAMRA-CATAGCCTGAAGAACGAGATCA-GCAGCC-BHQ2      |

<sup>a</sup> Primer used for both WT and null (N) alleles. F, forward; R, reverse.

<sup>b</sup> Donor FRET probe.

<sup>c</sup> Phosphorylated (P) acceptor FRET probes.

<sup>d</sup> TAMURA/BHQ probe.
